# Supplementary material for: The intramembrane protease Sppl2a is required for B cell and DC development and survival via cleavage of the invariant chain
Source: PubMed Central journal article supplement — J Exp Med. 2013 Jan 14;210(1):23–30. doi: 10.1084/jem.20121072 (PMC3549714; doi:10.1084/jem.20121072), 2013-01-14
Supplement: supp_jem.20121072_JEM_20121072_sm.pdf [file supp_jem.20121072_JEM_20121072_sm.pdf]

SUPPLEMENTAL MATERIAL

Beisner et al., <http://www.jem.org/cgi/content/full/jem.20121072/DC1>

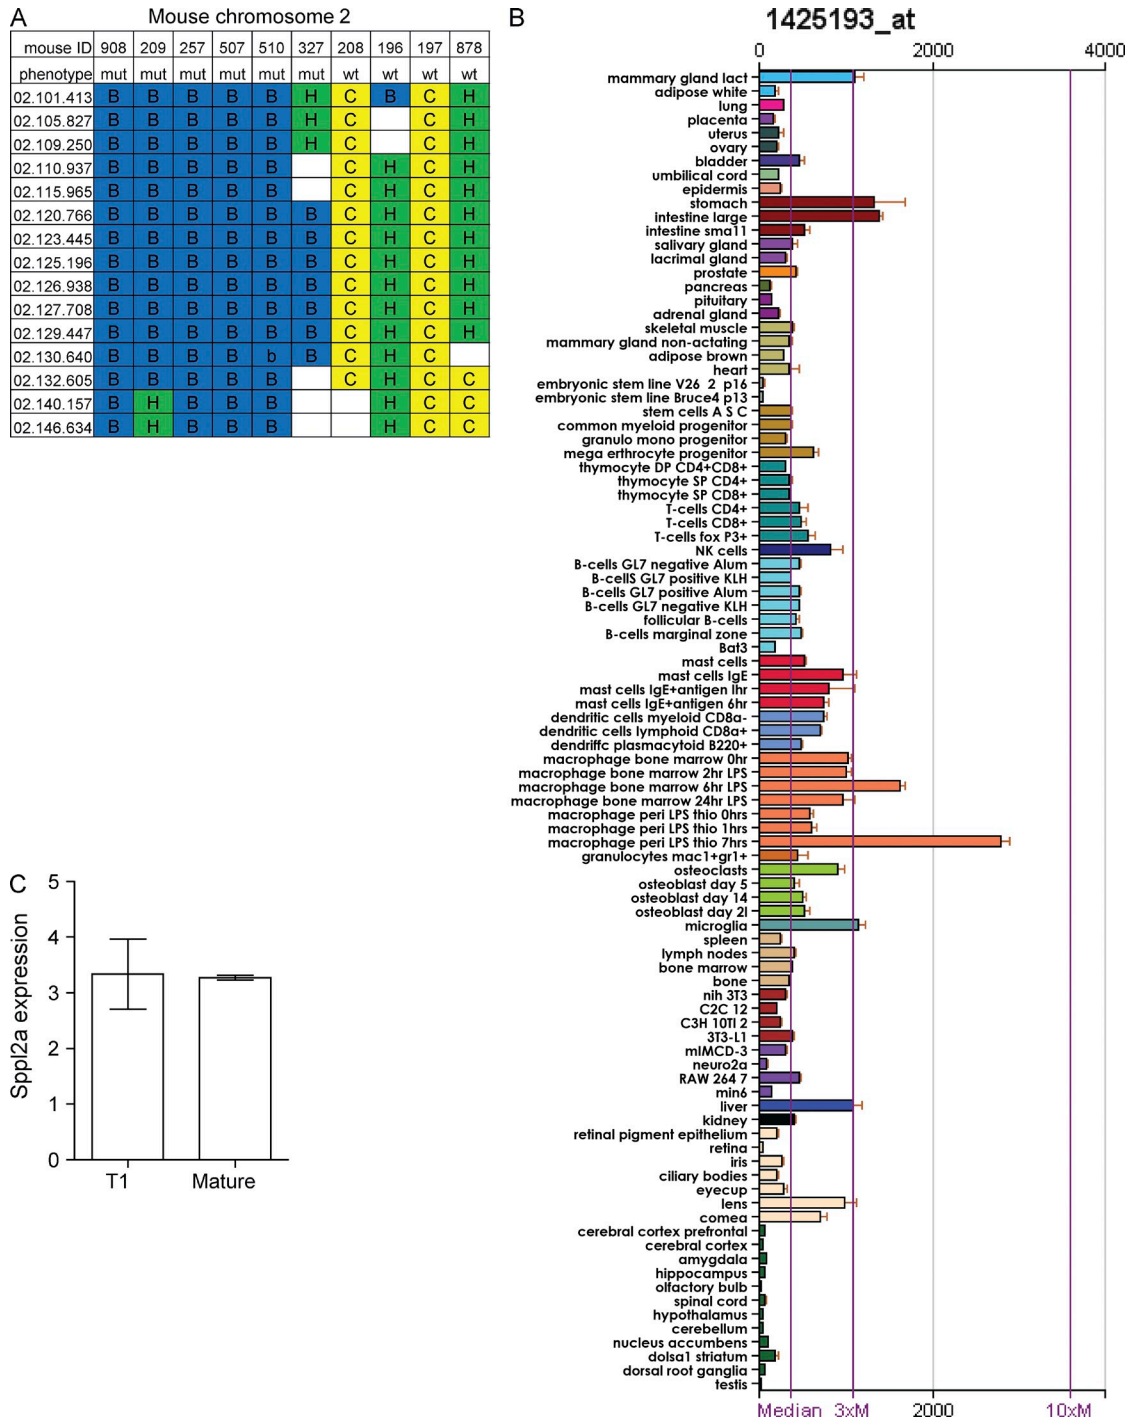

**Figure S1. Identification of *Sspl2a* by ENU mutagenesis.** (A) SNP analysis of B6 and BALB/c cross of mutants focusing in on chromosome 2. The far left column indicates chromosome number together with position in megabases. The genotype for each SNP is indicated as follows: B, homozygous C57BL/6J (blue); C, homozygous BALB/c (yellow); and H, heterozygous (green). This analysis maps the mutation to between 109.250Mb and 140.157Mb. (B) *Sspl2a* expression via microarray from a wide variety of mouse tissues. Data were downloaded from BioGPS (<http://biogps.org/#goto=welcome>). (C) *Sspl2a* mRNA expression was measured by quantitative PCR in FACS-sorted T1 (CD24<sup>hi</sup>CD21<sup>lo</sup>) and mature B cells (CD24<sup>lo</sup>CD21<sup>int</sup>; mean and average error,  $n = 2$  from two independent experiments).
